# Supplementary material for: Engineering a nanostructured “super surface” with superhydrophobic and superkilling properties†
Source: PubMed Central journal article supplement (PMC5654505; doi:10.1039/c5ra05206h), 2015-05-12
Supplement: NIHMS74547-supplement-SI.pdf [file NIHMS74547-supplement-SI.pdf]

*Supplementary Information for*

**Engineering a Nanostructured “Super Surface” with Superhydrophobic  
and Superkilling Properties**

Jafar Hasan<sup>a</sup>, Shammy Raj<sup>a</sup>, Lavendra Yadav<sup>b</sup>, Kaushik Chatterjee<sup>a\*</sup>

<sup>a</sup>Department of Materials Engineering and <sup>b</sup>Centre for Nanoscience and Engineering

Indian Institute of Science, Bangalore, Karnataka, India 560012

*\* author to whom all correspondence should be addressed*

Email: kchatterjee@materials.iisc.ernet.in

Tel: +91-80-22933408

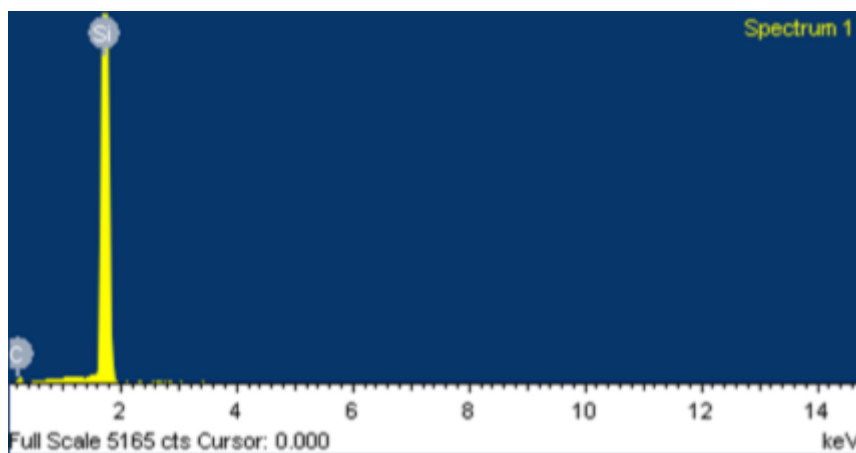

Figure S1. EDX spectra of the control (Silicon wafer) surface.

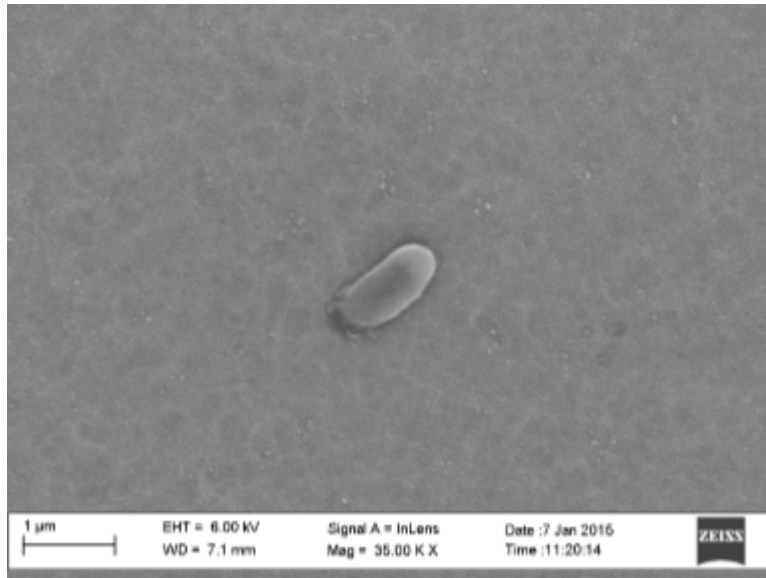

Figure S2. SEM image of an intact *E. coli* cell on a control (Silicon wafer) surface.

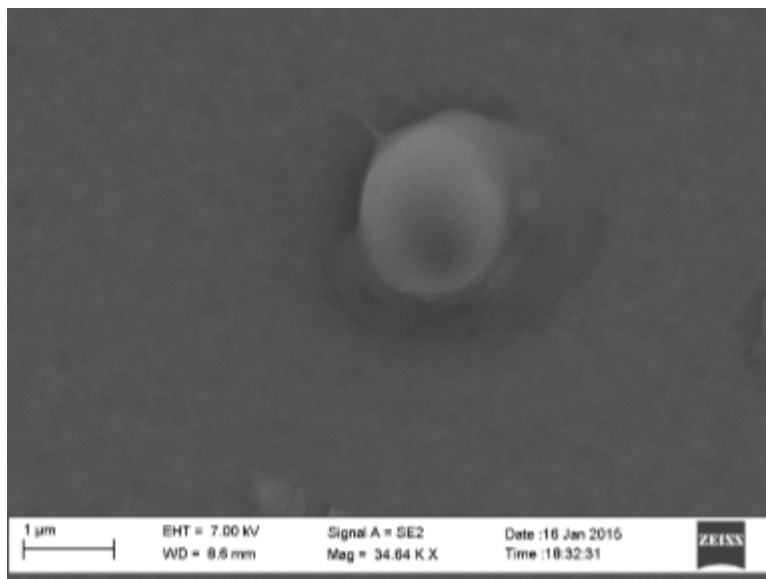

Figure S3. SEM image of an intact *S. aureus* cell on a control (Silicon wafer) surface

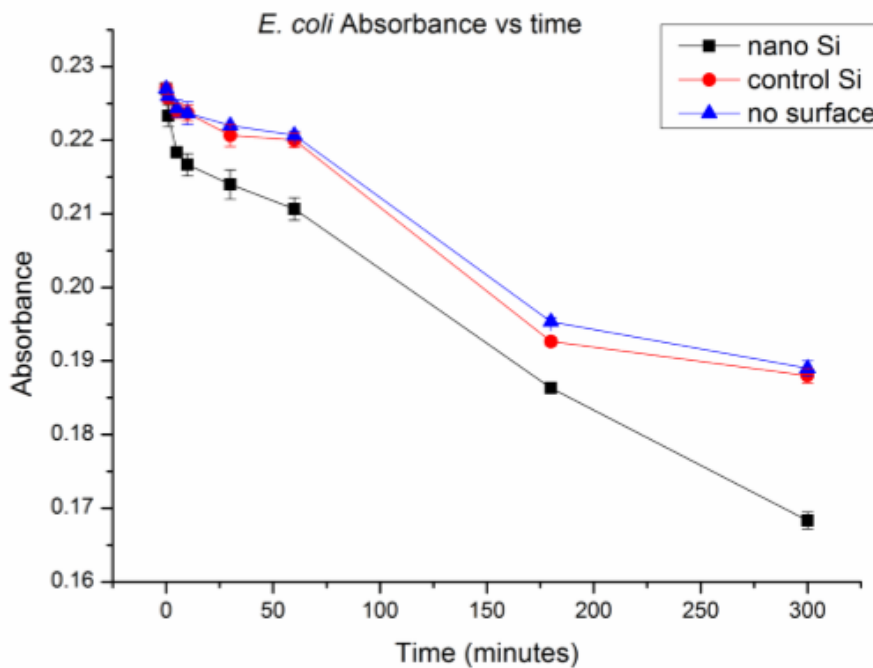

Figure S4. The absorbance values of the *E. coli* cells against the discrete incubation time intervals on the 0.5 cm × 0.5 cm of the controls and nanostructured surfaces. The surfaces were kept in 24-well plates where cells were present in 1 mL of 25 mM PBS solution and the OD measurements were taken after various time intervals.

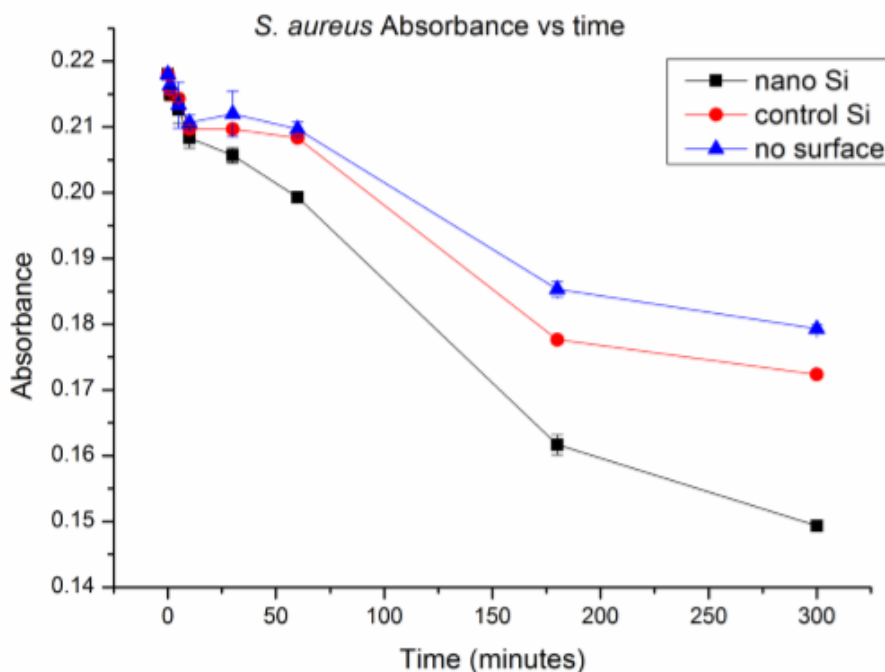

Figure S5. The absorbance values of the *S. aureus* cells against the discrete incubation time intervals on the 0.5 cm × 0.5 cm of the controls and nanostructured surfaces. The surfaces were kept in 24-well plates where cells were present in 1 mL of 25 mM PBS solution and the OD measurements were taken after various time intervals.

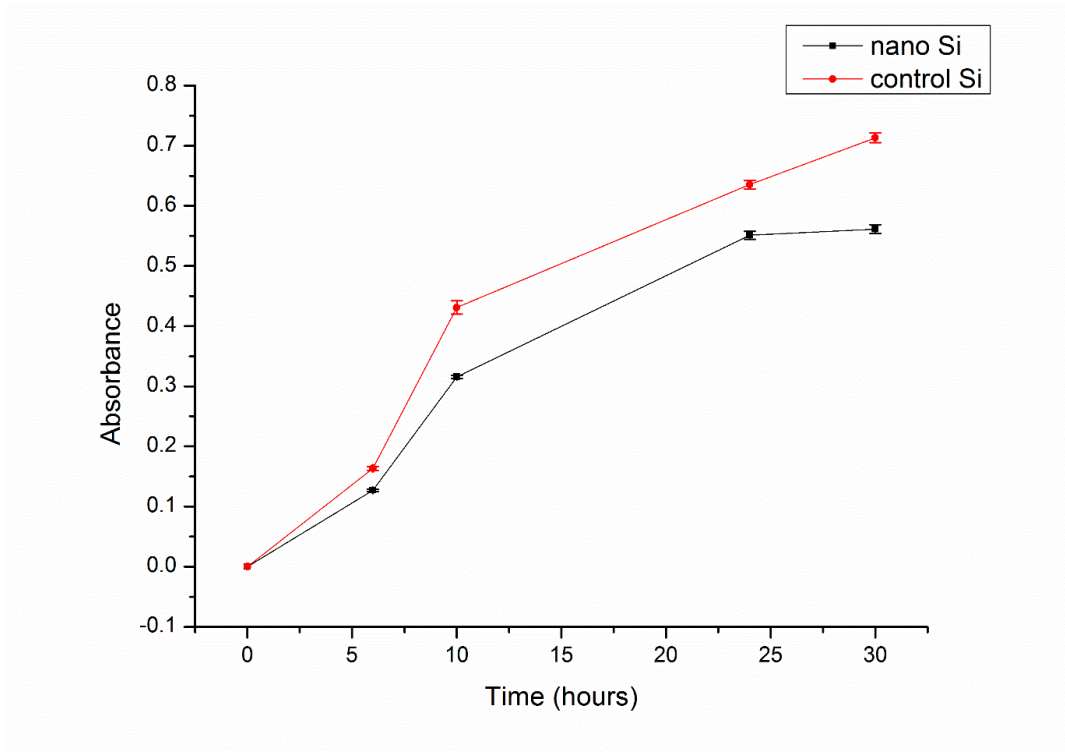

Figure S6. Absorbance vs time curve of the *E. coli* cells on the control and nanostructured surface in a growing nutrient media.

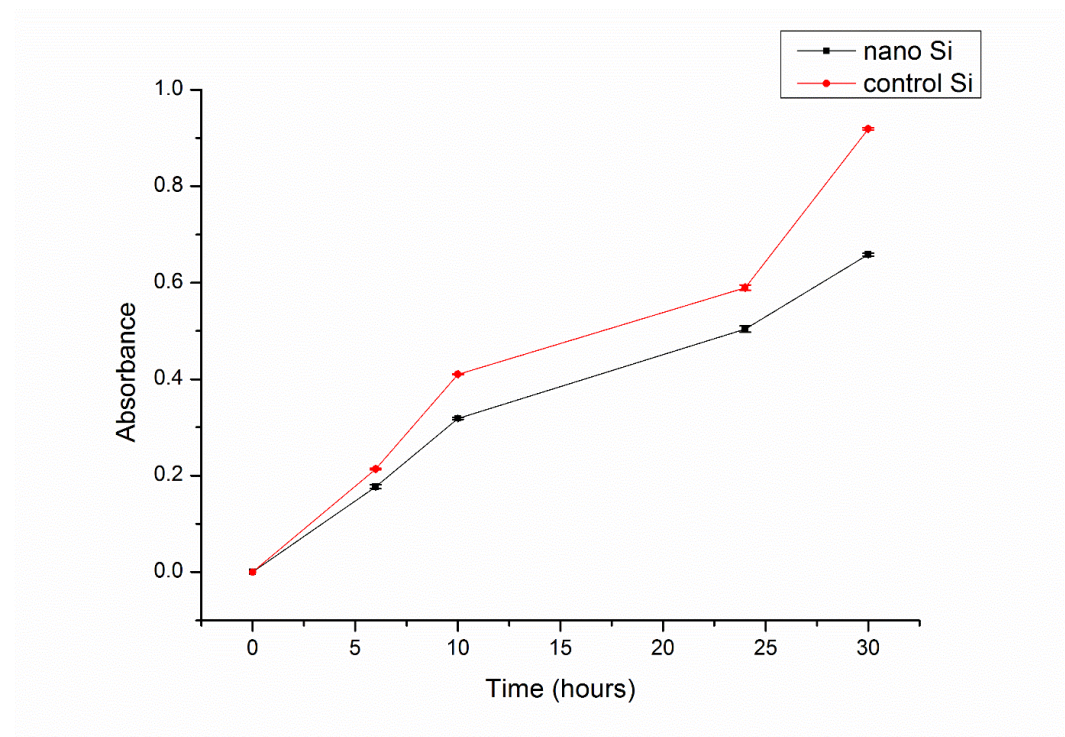

Figure S7. Absorbance vs time curve of the *S. aureus* cells on the control and nanostructured surface in a growing nutrient media.

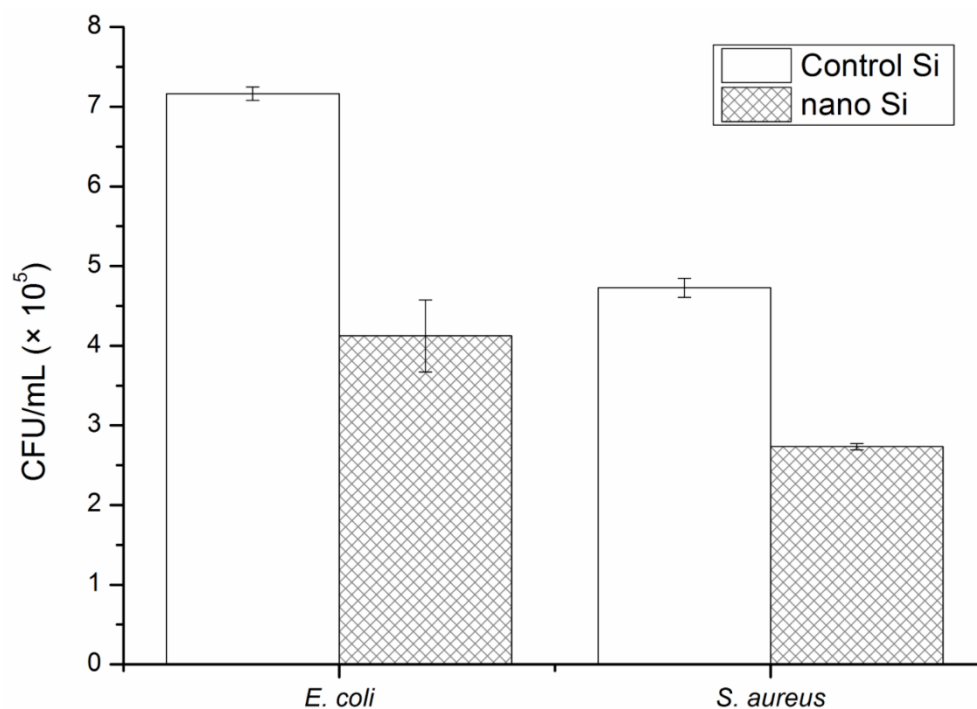

Figure S8. The colony forming units per mL of the two strains were measured after 1 hour incubation on control and nanostructured surfaces.

Table S1. Distribution of elements obtained from EDX spectra of the nanostructured silicon surface.

| Element | Weight % | Atomic % |
|---------|----------|----------|
| C K     | 20.68    | 35.71    |
| O K     | 1.42     | 1.84     |
| F K     | 13.90    | 15.17    |
| Si K    | 64.00    | 47.27    |

Table S2. Distribution of elements obtained from EDX spectra of the control surface.

| Element | Weight % | Atomic % |
|---------|----------|----------|
| C K     | 12.73    | 25.44    |
| Si K    | 87.27    | 74.56    |

Video S1. The low adhesive nature of the super surface is visible as the water droplet bounces and moves off the surface.
